# Supplementary material for: Generation of a pair of independently binding DNA aptamers in a single round of selection using proximity ligation
Source: Royal Society of Chemistry journal article supplement (doi:10.1039/c5cc02314a), 2015-01-01
Supplement: c5cc02314a1.pdf [file c5cc02314a1.pdf]

## Supplemental data

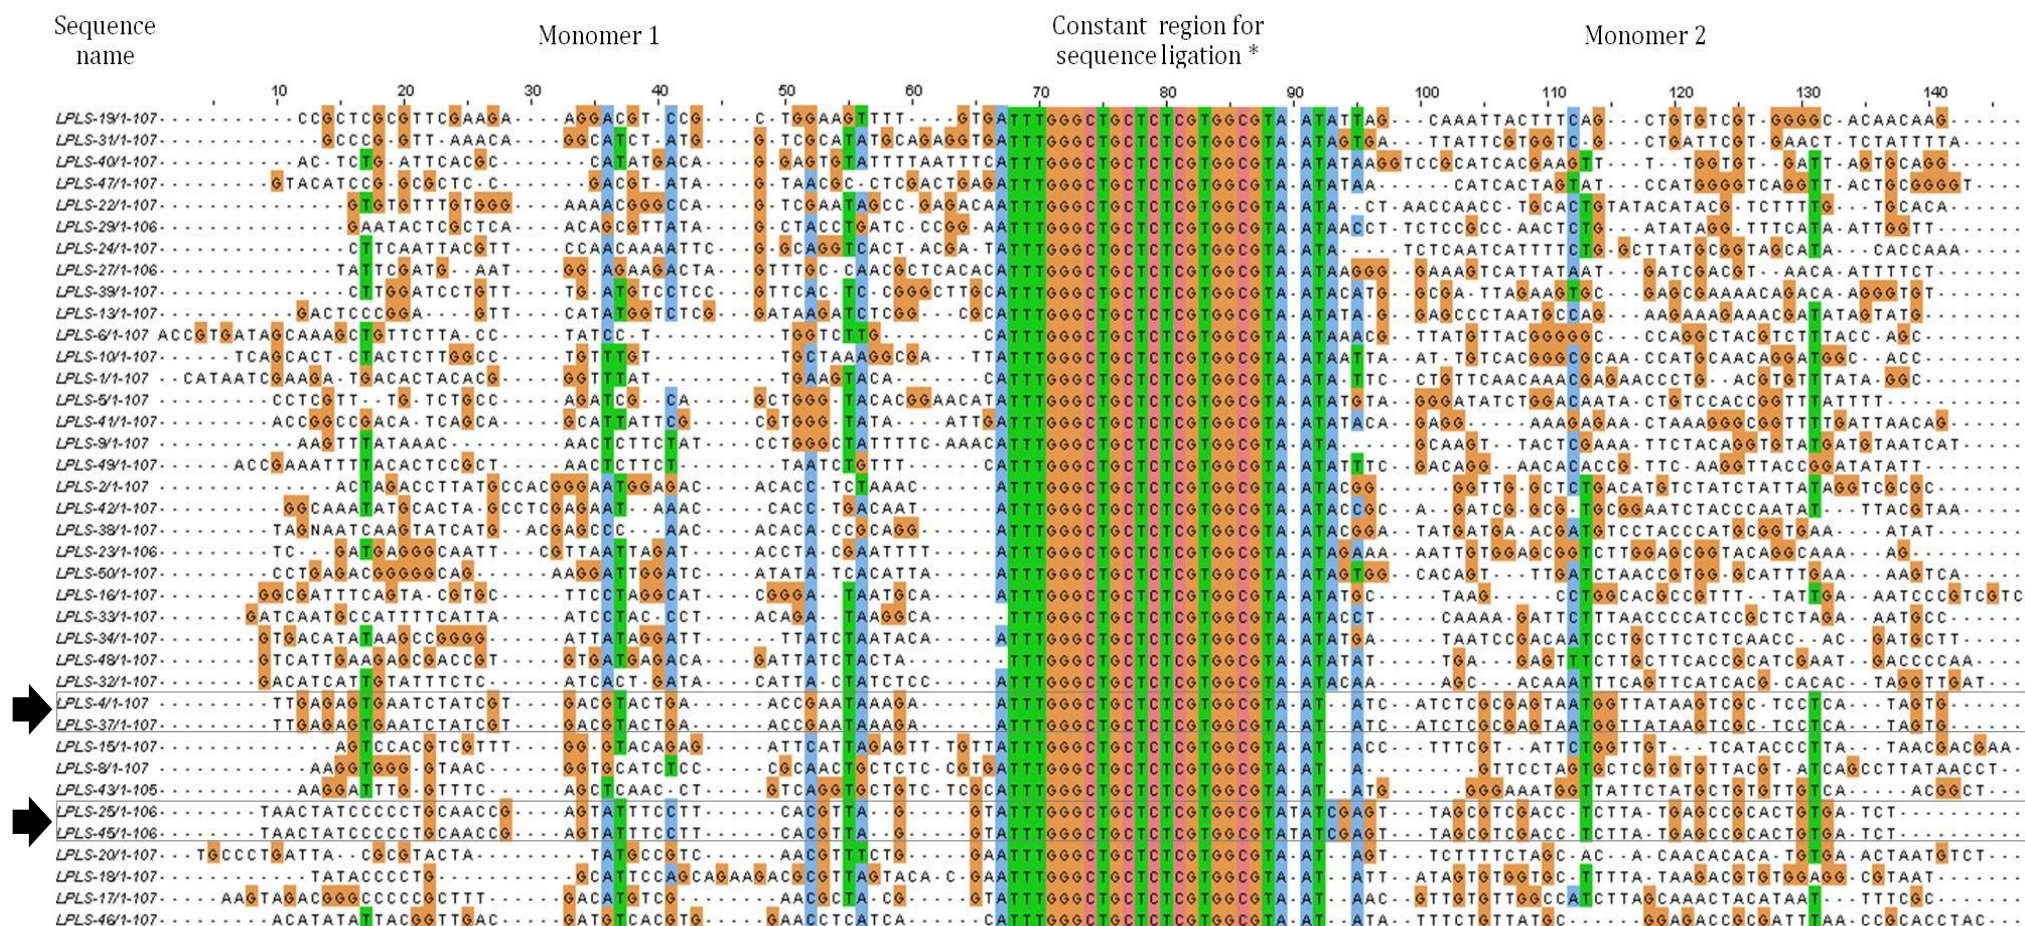

**Supplemental Figure 1.** PLS sequence alignment using ClustalW2 program. 38 sequences with correct constant ligation region and 5'-F-R-3' orientation were found from sequencing randomly picked 50 clones in the single round PLS against lysozyme. Monomer 1 and monomer 2 were from the F and R pool, respectively. Two sequences (arrows) were shown in duplicate and were subsequently selected for further characterization.

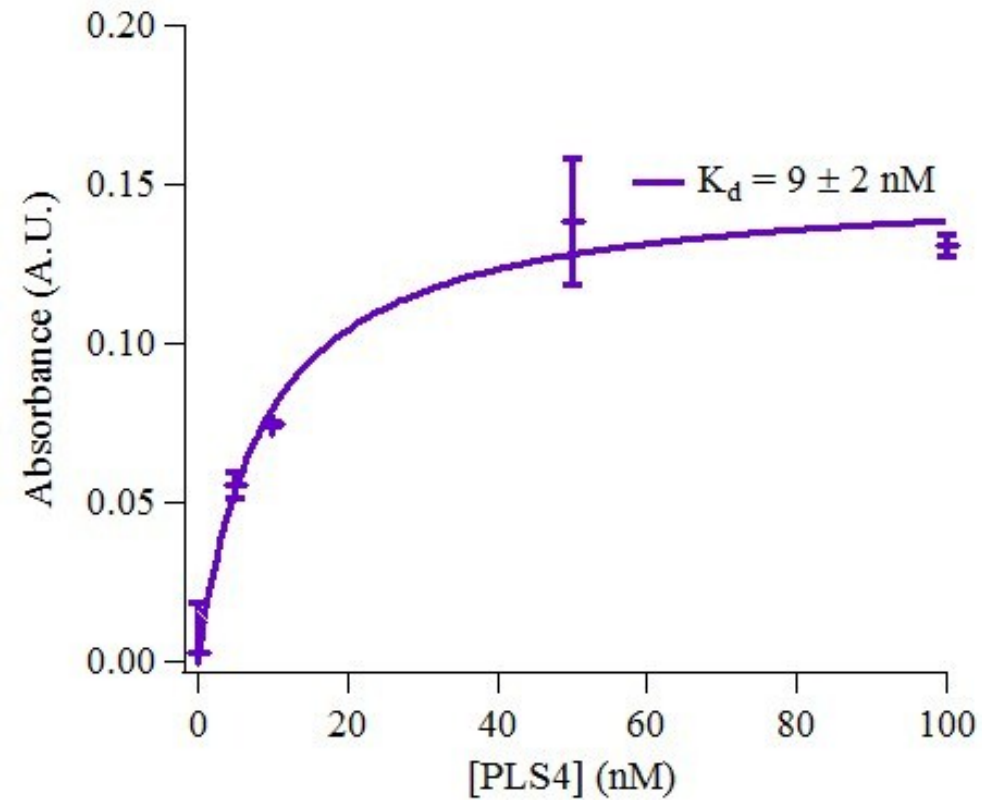

**Supplemental Figure 2:** Binding affinity of PLS4 aptamer to lysozyme by ELONA showed a  $K_d = 9 \pm 2$  nM.

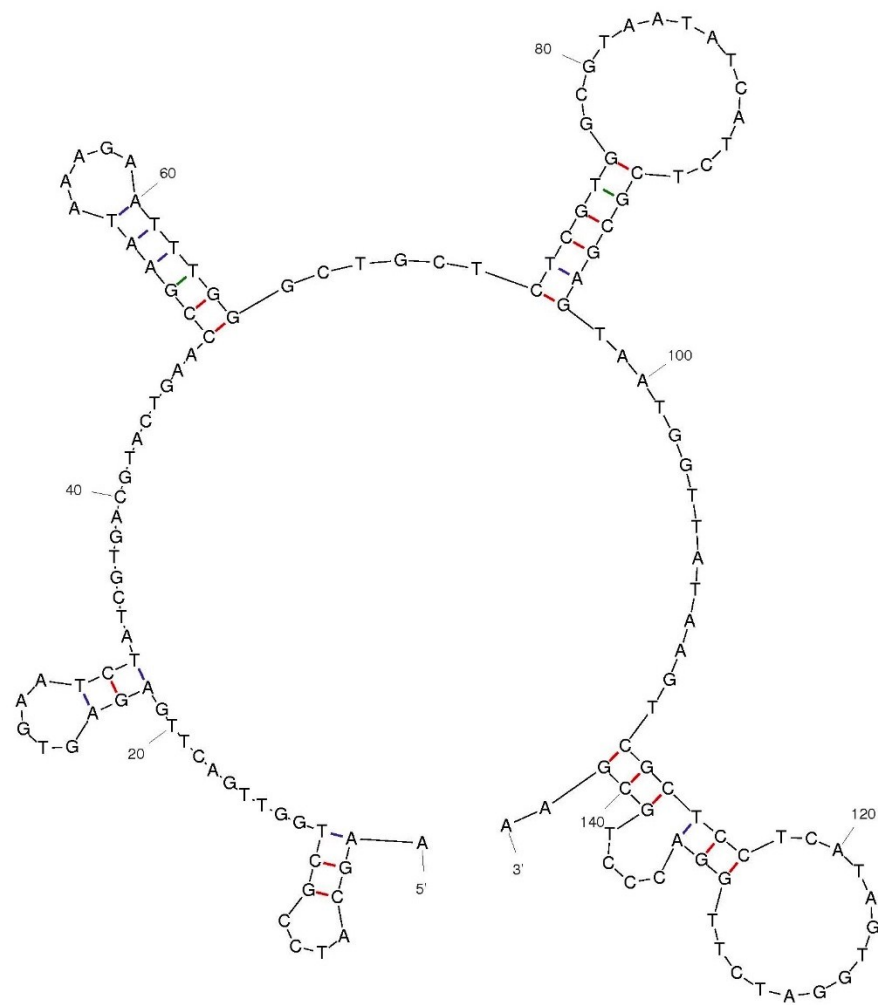

**Supplemental Figure 3:** Mfold structure of the linked PLS4 aptamer.
